# Supplementary material
Source: Springer Nature journal article supplement (https://www.springermedizin.de/resource/supplementary/12889_2012_5452_MOESM1_ESM.pdf/9495446)
Supplement: MOESM1 [file 9495446]

Records identified through  
online database searching  
(Phase One)  
Search conducted 7 March  
2012

(PubMed= 42)  
(Scopus= 94)  
**N = 136**

Additional records identified  
through other sources  
(Phases Two-Four)  
March-July 2012

Discussion Papers, Book  
Chapters, Reports  
**N= 20**

Records after duplicates removed  
**N = 129**

Records screened  
using literature review  
criteria  
**N = 129**

Records excluded  
**N = 99**

Full-text studies  
assessed for eligibility  
using CASP  
**N = 30**

Full-text studies  
excluded, with  
reasons  
**N= 4**

Studies included in  
integrative review  
**N=26**
